# Supplementary material
Source: publisher figshare collection journal article supplement (https://brill.figshare.com/ndownloader/files/14478983)
Supplement: Supplementary file 1 [file 14478983]

Lecture 7

**A new view of metaphorical creativity I.**

**Introduction**

Where do we recruit conceptual materials from when we speak, think and act metaphorically, and why?

*Where do we recruit novel and unconventional conceptual materials from when we speak, think and act metaphorically, and why?*

Issue of metaphorical creativity.

*Metaphor in Culture* (2005): “Source-related” creativity: “source-internal” and “source-external” creativity.

Lakoff and Turner (1989): elaboration and extending. death is sleep.

“Source-external”: “range of the target”

“target-related” creativity: a particular target that is conventionally associated with a source “connects back” to the source taking further knowledge structures from it: *fire-exit* from the source domain of building on the basis of target domain knowledge in the europe is a building metaphor. “target-induced” creativity.

“context-induced creativity” - “context-induced metaphors.”

(1) the immediate physical setting,

(2) what we know about the major entities participating in the discourse,

(3) the immediate cultural context,

(4) the immediate social setting, and

(5) the immediate linguistic context itself.

in everyday forms of language - in poetry and literature in general.

*More Than Cool Reason*. Lakoff and Turner make two very important claims.

elaboration, extension, questioning, and combining.

Poetry make use of what he and Fauconnier call “blends,” in which various elements from two or more spaces, domains, or frames, can be conceptually fused, or integrated (see, e.g., Turner 1996; Fauconnier and Turner 2002).

When ordinary people conceptualize an idea metaphorically, they do so under two kinds of pressure called the “pressure of coherence”: the pressure of their bodily experiences and the pressure of the context that surrounds them (Kövecses 2005).

issue of universality and variation in metaphorical conceptualization.

primary metaphors: based on correlations in bodily experience and, hence, that these metaphors are embodied (Grady 1997a, b; Lakoff and Johnson 1999).

“complex metaphors.”

Focus on universal aspects of metaphor.

another line of research: variation we can find in metaphor both cross-culturally and within cultures. (Kövecses, 2005).

a variety of contextual factors: differences in key concepts in a culture, in history, and environment.

Embodiment – Universality

Context – Variation

Metaphorical conceptualizers try to be coherent with both their bodies (i.e., correlations in bodily experience) and their contexts (i.e., various contextual factors).

global context: contextual factors that affect all members of a language community when they conceptualize something metaphorically.

local context: immediate contextual factors that apply to particular conceptualizers in specific situations.

**Global contexts**

*Physical environment*. English.

*Social factors.* Women and men.

*Cultural context.* governing principles and key concepts. hat and ship. sleeve and food.

*Differential memory*. life for Hungarians and Americans.

*Differential concerns and interests*. British English and American English.

**Local contexts**

***The effect of immediate physical setting on metaphor use***

The 2005 hurricane capsized Domino’s life, though he’s loath to confess any inconvenience or misery outside of missing his social circle … (USA TODAY, 2007, September 21, Section 6B)

*The physical context in poetry*

Poets may describe the context in which they create poetry.

They may use context as a means of talking about something else.

Matthew Arnold’s *Dover Beach*:

The sea is calm to-night.

The tide is full, the moon lies fair

Upon the straits,- on the French coast, the light

Gleams and is gone; the cliffs of England stand,

Glimmering and vast, out in the tranquil bay.

Come to the window, sweet is the night-air!

(retrieved from http://www.artofeurope.com/arnold/arn1.htm)

Only, from the long line of spray

Where the sea meets the moon-blanched land,

Listen! You hear the grating roar

Of pebbles which the waves suck back, and fling,

At their return, up the high strand,

Begin, and cease, and then again begin,

With tremulous cadence slow, and bring

The eternal note of sadness in.

(retrieved from http://www.artofeurope.com/arnold/arn1.htm)

Sophocles long ago

Heard it on the Aegean, and it brought

Into his mind the turbid ebb and flow

Of human misery; we

Find also in the sound a thought,

Hearing it by this distant northern sea.

(retrieved from http://www.artofeurope.com/arnold/arn1.htm)

The sea of Faith

Was once, too, at the full, and round earth’s shore

Lay like the folds of a bright girdle furled.

But now I only hear

Its melancholy, long, withdrawing roar,

Retreating, to the breath

Of the night-wind, down the vast edges drear

And naked shingles of the world.

(retrieved from http://www.artofeurope.com/arnold/arn1.htm)

health is wholeness and perfection/ completeness is roundness, as indicated by the expressions “at the *full*” (wholeness) and “and *round* earth’s shore” (roundness).

“the sea of Faith.” (christian) faith is the sea and people are the land.

Christian faith provided people with a spiritual health (health is wholeness)

perfect state of the human condition (perfection is roundness).

the ebb and flow of the sea.

***The effect of knowledge about major entities in the discourse on metaphor use***

speaker (conceptualizer), the hearer (addressee/ conceptualizer), and the entity or process we talk about (topic).

*Topic.*

Sir, The letters about odd headlines … reminded me of an all-time favourite. In the early 1980s Michael Foot became the leader of the Labour Party. He was also a co-founder of CND and pushed for nuclear disarmament. Mr Foot travelled to Brussels to chair a lobby group in the European Parliament to construct a plan to get rid of the bomb as part of the European election policy. From this came the headline “Foot heads arms body”. (*The Times*, Letters to the Editor, Wednesday January 30 2008, p. 16)

*Conceptualizer.*

In the beginning, I didn’t make the connection between the subject matter and my own sero-positivity. I was asked to be part of the Day Without Art exhibition a few years ago and didn’t think I was worthy—other artists’ work was much more HIV-specific. … But my mentor said, “Don’t you see the connection? You’re documenting something that was never intended to live this long. You never intended to live this long.” [p. 27; italics in the original]

surviving aids despite predictions to the contrary is for the old mural advertisements to survive their expected “life span.”

*Topic and addressee*.

Beckham is 32. He has not played top-class football since November. Los Angeles Galaxy are sardines not sharks in the ocean of footy.

the size of social groups is the size of physical entities and social competition is the survival behavior of animals.

“Dear *Signor* Capello” (my italics, ZK).

“Beckham is a good footballer and a nice man: *e una bella figura*” (italics in the original, ZK).

***Knowledge about the main entities of discourse in poetry***

*Speaker/ Poet*.

… I propose to concentrate on the fact of illness itself as a governing factor in Dickinson’s development as a poet. We are already accustomed to thinking about ways in which illness or deformity modulate the registers of expression we hear while reading Milton, Keats, Emily Bronte, Lord Byron. For Dickinson, illness was a formative experience as well, one which shaped her entire poetic methodology from perception to inscription and which very likely shook the foundations of her faith. Reading Dickinson’s poems in the full knowledge and belief that, while writing them, she was suffering acutely from a seemingly irremediable illness renders many of them recuperable as almost diaristic records of a rather ordinary person’s courageous struggle against profound adversity. (Guthrie 1998: 4-5)

I reckon – when I count it all –

First – Poets – Then the Sun –

Then Summer – Then the Heaven of God –

And then – the List is done –

But, looking back – the First so seems

To Comprehend the Whole –

The Others look a needless Show –

So I write – Poets – All –

Their Summer – lasts a Solid Year –

They can afford a Sun

The East – would deem extravagant –

And if the Further Heaven –

Be Beautiful as they prepare

For Those who worship Them –

It is too difficult a Grace –

To justify the Dream –

(retrieved from http://poetry.poetryx.com/poems/2520/)

poetic creativity is a new way of seeing (as a result of the summer sun).

summer  productive period

sun  inspiration

new way of seeing  being poetically creative (i.e., coming up with a poem)

poems are heavens.

further heaven  poem

worshippers  people reading poetry

God  poet

As an important additional mapping in this metaphor, we also have:

God’s grace  poet’s inspiration

Impaired vision is put to use in an extraordinary way in this poem by Dickinson.

*Topic and addressee.*

Sylvia Plath’s poem, *Medusa*.

Off that landspit of stony mouth-plugs,
Eyes rolled by white sticks,
Ears cupping the sea's incoherences,
You house your unnerving head -- God-ball,
Lens of mercies,
Your stooges
Plying their wild cells in my keel's shadow,
Pushing by like hearts,
Red stigmata at the very center,
Riding the rip tide to the nearest point of
departure,

Dragging their Jesus hair.
Did I escape, I wonder?

(retrieved from http://www.americanpoems.com/poets/sylviaplath/1412)

The strained and ambivalent nature of the relationship is one of the major topics, or subject matters, of the poem.

In Greek mythology, Medusa is a gorgon with snakes for hair, who turns people who look at her to stone.

Negative aspects of Plath’s relationship to her mother are analogically reflected in the Medusa metaphor (“your unnerving head”).

I propose that it is the addressee and the topic of the discourse (the poem) that primarily governs the choice of the image applied to the mother – though conveyed in the form of a culturally defined analogy.
